1  
2  
3  
4  
5  
6  
7  
8  
9  
10  
11  
12  
13  
14  
15  
16  
17  
18  
19  
20  
21  
22  
23  
24  
25  
26  
27  
28  
29  
30  
31  
32  
33  
34  
35  
36  
37  
38  
39  
40  
41  
42  
43  
44

**Cerina- Cognitive Behavioural Therapy based mobile application for managing GAD symptoms among Ulster University Students in Northern Ireland: A Protocol for a Pilot Feasibility Randomized Controlled Trial**

Eylem-van Bergeijk<sup>1,2</sup>, O., Poulter<sup>3</sup>, S., Ashcroft, K<sup>3</sup>., Robinson, T<sup>3</sup>., Mane, P<sup>2</sup>., Islam, M<sup>2</sup>. Condell, J<sup>3</sup>., Leavey, G<sup>4</sup>.

<sup>1</sup> Division of Population Health, Health Services Research and Primary Care, University of Manchester, The United Kingdom  
<sup>2</sup> Cerina Therapeutics, London, The United Kingdom  
<sup>3</sup> School of Computing, Engineering and Intelligent Systems Human Centred Computing, Intelligent Systems Research Centre, Ulster University, Northern Ireland, The United Kingdom  
<sup>4</sup> The Bamford Centre for Mental Health and Wellbeing, School of Psychology, Ulster University, Northern Ireland, The United Kingdom

**Abstract:**

**Introduction:** University students are one of the most vulnerable populations for anxiety disorders worldwide. In Northern Ireland, anxiety disorders appear to be more common among the university student population due to the population demographics across the region. Despite the need, these students show less inclination to access the widely available on-campus well-being services and other external professional services. Digital Cognitive Behaviour Therapy (CBT) aims to bridge this gap between the need for psychological help and access to it. However, challenges such as limited reach, low adoption, implementation barriers and poor long-term maintenance are mainstay issues resulting in reduced uptake of digital CBT. As a result, the potential impact of digital CBT is currently restricted. The proposed intervention “Cerina” is a scalable CBT-based mobile app with an interactive user interface that can be implemented in University settings if found to be feasible and effective.

**Methods and analysis:** The study is a single-blind pilot feasibility Randomized Controlled Trial (RCT) aiming to test the feasibility and preliminary effects of Cerina in reducing Generalised Anxiety Disorder (GAD) symptoms. Participants are 90 Ulster University students aged 18 and above with self-reported GAD symptoms. They will be allocated to two conditions: Treatment (i.e., access to Cerina for 6 weeks) and a waitlist control group (i.e., optional on-campus wellbeing services for 6 weeks). Participants in the waitlist will access Cerina 6 weeks after their randomization and participants in both conditions will be assessed at baseline, at 3 (mid-assessment), and 6 weeks (post-assessment). The primary outcome is the feasibility of Cerina (i.e. adherence to the intervention, its usability and the potential to deliver a full trial in the future). The secondary outcomes include generalised anxiety, depression, worry and quality of life. Additionally, participants in both conditions will be invited to semi-structured interviews for process evaluation.

**Ethics and dissemination:** Ethical approval for the study has been granted by the Ulster University Research Ethics Committee (ID: FCPSY-22-084). The results of the study will be disseminated through publications in scientific articles and presentations at relevant conferences and/or public events.

**Trial registration:** ClinicalTrials.gov ID NCT06146530

45 **Strengths and Limitations:**

- 46 • Low-threshold CBT-based mobile application, easily accessible to university student population
- 47 • Partnership between Ulster University, Ulster Student Wellbeing team and a mental health start-up
- 48 to increase the reach and access the target population and evaluate the intervention.
- 49 • The study is designed as a feasibility trial and is not powered to detect statistically significant
- 50 effect of the intervention.
- 51 • The study results might not generalise beyond the inclusion and exclusion criteria of the current
- 52 study.
- 53 • The waitlist control groups are known to overestimate the effects of the intervention compared to
- 54 treatment as usual
- 55

## 57 Introduction

58 It is estimated that 264 million adults around the globe have anxiety (1). Of these adults, 179 million  
59 are female (63%) and 105 million are male (37%) (2). Anxiety disorders are very costly and are one of  
60 the leading contributors to the global health-related burden (3). According to the data on anxiety  
61 disorders obtained from the World Health Organization (WHO) Global Burden of Disease Study in  
62 2019, the relative risk of the incidence of anxiety disorders and the disability-adjusted life years  
63 increased with age in adolescence and middle age and then decreased among people of both sexes (4).  
64 The most common anxiety disorder is Generalised Anxiety Disorder (GAD) affecting almost 30-40%  
65 of the global population (1). It is estimated that the prevalence of GAD varies widely across countries,  
66 with lifetime prevalence highest in high-income countries (5.0% [0.1%]), lower in middle-income  
67 countries (2.8% [0.1%]), and lowest in low-income countries (1.6% [0.1%]) (2). Lifetime comorbidity  
68 is high (81.9% [0.7%]), particularly with mood (63.0% [0.9%]) and other anxiety (51.7% [0.9%])  
69 disorders. Treatment is sought by approximately half of the affected individuals (49.2% [1.2%]) in  
70 high-income countries (3). This means that GAD is untreated and unrecognised (5).

71 University students are one of the vulnerable populations for common mental health conditions  
72 (CMDs) in general and anxiety disorders specifically (6-8). According to the WHO, one out of three  
73 students was diagnosable with at least one CMDs, the most prevalent anxiety disorder in 2018 (6).  
74 During the COVID 19 pandemic, anxiety disorders alone affected about one in three students (9-11).  
75 The existing longitudinal studies do not consistently support the increased risk for GAD among  
76 students in the long term (12-14). However, they indicate a potential sub-group of students such as  
77 those who report more financial uncertainty or a history of CMDs, who could be more at risk of severe  
78 GAD and co-morbid CMDs and problems (13). From the life course perspective (15), university years  
79 correspond to emerging adulthood that is characterised by a transition period between adolescence and  
80 adulthood (16). On the one hand, ongoing life transitions and developmental alterations in this period  
81 can offer opportunities for self-exploration and growth (17). While on the other hand, such life  
82 transitions can exacerbate uncertainty, ambivalent feelings and risky behaviours (15). Additionally,  
83 international students and students from ethnic and sexual minority backgrounds may experience  
84 additional stressors related to culture shock, discrimination and lack of social and cultural capital (18).  
85 These stressors can interact with pre-existing vulnerabilities and well-known stressors such as  
86 academic pressure, financial uncertainties due to large amounts of study loans, and can lead to  
87 heightened stress which is central to the onset of physical and psychological conditions (19,20).

88 In Northern Ireland (NI), mental health problems and anxiety disorders are especially prevalent among  
89 university students due to the population demographics across the region in addition to the above  
90 mentioned factors common to the global university student population (9, 21,22). According to the  
91 data collected at Ulster University as part of the WHO World Mental Health International College  
92 Student Project (WMH-ICS), receipt of treatment was low (37.8%) (N=392), particularly among  
93 males and those with life time mental health condition with no suicidal thoughts and behaviours  
94 (STBs) (23). Males were less inclined to seek external professional services. However, interestingly  
95 they were less likely than females to rate embarrassment (OR=0.60) and/or worry about being treated  
96 differently (OR=0.63) as reasons for not seeking help (23). Additionally, those with a life-time mental  
97 health condition reported lower perceived need and/or readiness to change, and they rated being  
98 unsure about where to go as a more important barrier (OR=1.80) compared to those with STBs and  
99 without a life-time mental health condition (23). Moreover, a recent study conducted at Ulster  
100 University based on WMH-ICS data indicated that 22.6% (N=739) of students reported GAD  
101 symptoms, and students older than 21, those from LGBTQ+, and low SES backgrounds were less  
102 likely to access available psychological help (9). These results highlight vulnerability in line with the  
103 literature on mental health problems and the barriers to help-seeking among university student

104 populations (24,25). Therefore, early interventions addressing the need for psychological care and  
105 treatment of diverse student populations are crucial even if they do not have suicidal thoughts (23).

106 Cognitive Behavioural Therapy (CBT) and pharmacotherapy are recommended evidence-based first-  
107 line interventions for GAD (26). CBT is equally effective as pharmacotherapy at the short term, but  
108 has larger overall treatment effects and fewer side effects than pharmacotherapy at the longer term (6-  
109 12 months follow-up) ( $g=0.34$ ) (27). Despite the effectiveness and the favourable benefits of CBT  
110 over medication, there are recognised shortcomings in the current treatment of GAD resulting in a  
111 lengthy delay in the help-seeking process (6). Face-to-face CBT may not be accessible to everyone in  
112 need due to social (e.g. perceived stigma), organisational (e.g. waiting times and service availability),  
113 or financial reasons (e.g. in healthcare contexts where one must pay for their treatments) (28,29).

114 Digital CBT including CBT-based smartphone applications and web-based interventions may help  
115 overcome the above-mentioned barriers. They allow anonymity and accessibility. Also, they can  
116 reduce the costs associated with the provision of human resources by providing low-threshold access  
117 to evidence-based treatment among those who are in need (30). The existing literature point to mixed  
118 results about the effectiveness of these interventions in reducing GAD symptoms among student  
119 populations. For instance, a Randomized Controlled Trial (RCT) investigating the effectiveness of a  
120 guided, individually tailored web-based CBT programme, ICare Prevent in the Netherlands, indicated  
121 no evidence of a difference between the intervention and treatment as usual in anxiety and any of the  
122 examined outcomes (31). However, other RCTs investigating the same intervention reported  
123 promising results in terms of the feasibility, acceptability, and potential effectiveness of ICare Prevent  
124 among students with anxiety and/or depression in Germany (32,33) in South Africa (34) and Indonesia  
125 (35). Further support for the feasibility and potential effectiveness of digital CBT interventions among  
126 students have been provided by other RCTs (36,37).

127 Despite the obvious benefits of digital CBT, engaging with the intended users can be challenging. The  
128 percentage of those who complete the sessions ranges from 10% to 76% and dropout ranges from 30%  
129 to 40%. (38,39-41). Furthermore, an open feasibility trial by Lattie and colleagues (42) indicated that  
130 only a relatively small portion of a sample of university students (26.5%; 31/117) downloaded one or  
131 more of the CBT-based apps tested in the study, and approximately 24% (28/117) participants used  
132 these apps only once (42). Recent systematic reviews pointed out that two intervention methods show  
133 promise in mitigating the problem of low engagement with digital interventions (43,44). One approach  
134 aims to improve engagement through personalised feedback, customised notifications, and reminders  
135 (43). An alternative approach is aimed at changing users' attitudes or behaviours by incorporating  
136 game-like strategies such as avatars (i.e. virtual therapists) or chatbots initiating conversations with  
137 users about specific content and/or exercises (43,44).

138 Overall, there are mixed results for the effectiveness of digital CBT interventions, and their impact is  
139 restricted by the issues related to limited reach, low adoption, implementation barriers and poor long-  
140 term maintenance among the intended users (45). Nevertheless, there is a need to test further  
141 approaches to address generalised anxiety symptoms among university student populations.  
142 Furthermore, there is a significant scope to improve the adherence to digital CBT-based interventions  
143 based on the above-mentioned intervention approaches utilising emerging technologies. In light of  
144 this, Cerina, a mental health start-up based in the UK, has developed a CBT-based mobile application  
145 for treating GAD symptoms which aims to address the unmet need through an interactive User  
146 Interface (UI) incorporating game-like strategies such as a chatbot, and engagement features such as  
147 customised notifications and pop-up reminders. The aims of the proposed study are two-fold: 1) To  
148 learn about the feasibility (i.e. adherence to the intervention, its usability and potential to deliver a full  
149 trial in the future) of Cerina among a university student population; and 2) to test the preliminary  
150 effects of Cerina in reducing GAD symptoms compared to a wait-list control group among Ulster  
151 University students presenting with self-reported GAD symptoms.

152 **Methods:**

153

154 **Setting**

155 The study will be carried out in partnership between Cerina, a company developing CBT-based mobile  
156 applications for treating psychological disorders, and Ulster University as part of the NWE  
157 INTERREG IT4Anxiety project. The overarching aim of the IT4Anxiety project is to support the  
158 implementation of innovative solutions through start-ups to reduce anxiety. Ulster University has  
159 approximately 30,000 students enrolled in undergraduate, post-graduate and e-learning programmes  
160 across its four main campuses: Belfast, Coleraine, Derry Londonderry (Magee) and Jordanstown in  
161 Northern Ireland.

162

163 **Study Design**

164 The study is a single-blind pilot feasibility Randomized Controlled Trial (RCT) with two conditions:  
165 Treatment and a Waitlist control group.

166 Eligible participants who have completed the baseline questionnaire will be randomized either into the  
167 treatment group in which they have access to the Cerina application for six weeks or into the wait-list  
168 control group in which they have access to the on-campus wellbeing services until the intervention  
169 group completes Cerina. They will then receive access to Cerina. Please see table1 for the study design  
170 and figure 1 for the participant flow through trial.

171

172 Table 1. Study Design

| <b>Condition</b>  | <b>Pre-test<br/>T0</b> |                 | <b>3 weeks<br/>T1</b> | <b>6 weeks<br/>follow-up<br/>T2</b> |        |
|-------------------|------------------------|-----------------|-----------------------|-------------------------------------|--------|
| Treatment         | X                      | Cerina          | X                     | X                                   |        |
| Wait-list Control | X                      | Routine<br>Care | X                     | X                                   | Cerina |

173

174 All participants will be asked to fill in online self-report measures of GAD, depression, worry, and  
175 work and social adjustment at baseline (t0), at 3 weeks (t1), and at 6 weeks (t2) (see Table 2).  
176 Additionally, semi-structured interviews will be conducted with the participants to explore which  
177 elements of the intervention facilitated or hindered participants' progress during the study and how the  
178 intervention can be optimised to increase its acceptability, relevance, and user-friendliness in real-life  
179 settings. Intervention group participants will be invited to the semi-structured interviews right after  
180 they complete their follow-up assessments at week 6. Wait-list control group participants will also be  
181 invited to the interviews after they access Cerina and complete their 6-week follow-up assessments.

182

183 *Insert Figure 1 Participant flow through trial*

184

185

186 Table 2. Measures collected and the time point of data collection for both groups

| Outcome measures                | Baseline<br>(t0) | 3 weeks<br>(t1) | 6 weeks<br>(t2) |
|---------------------------------|------------------|-----------------|-----------------|
| GAD-7                           | X                | X               | X               |
| PSWQ-PW                         | X                | X               | X               |
| PHQ9                            | X                | X               | X               |
| WSAS                            | X                | X               | X               |
| SUS                             |                  | X               | X               |
| Semi-structured<br>interviews * |                  |                 | X               |

187 Note: GAD-7 (Generalised Anxiety Disorder Scale-7); PSWQ-PW (Penn State Worry Questionnaire); PHQ-9  
188 (Patient Health Questionnaire-9); WSAS (Work Social Adjustment Scale); SUS (System Usability Scale)

189 \* Intervention group participants are invited to the semi-structured interviews right after they complete their  
190 follow-up assessments at week 6. Wait-list control group participants are invited to the interviews after they  
191 access Cerina and complete their 6-week follow-up assessments.

192

### 193 **Randomization, Treatment Allocation, and Blinding**

194 The randomization scheme will be derived using random allocation software by the Cerina technical  
195 lead who is not involved in the study. Randomization will take place in blocks of 6 and will take place  
196 in a 1:1 ratio. Allocation will be concealed from the researchers involved in the study. It is not possible  
197 to mask participants due to the waitlist control group and the nature of the intervention. All  
198 participants will be informed about the condition they are assigned to.

199

### 200 **Participants**

201 Participants will be adult students attending Ulster University who have reported anxiety symptoms  
202 based on the Generalised Anxiety Disorder Scale-7 (GAD7) questionnaire.

203

### 204 **Inclusion criteria:**

- 205 • Having mild to severe self-reported anxiety symptoms. Those who score between 5 and 19 on  
206 the GAD7 questionnaire will be accepted as eligible,
- 207 • 18 years of age and older
- 208 • Enrolled as a student at Ulster University (i.e. having a student ID number)
- 209 • Fluency in English
- 210 • Provision of an informed consent
- 211 • Have a smartphone (i.e. Android device or iPhone).
- 212 • Have an internet connection

213

214 **Exclusion criteria:**

- 215 • Have minimal anxiety symptoms as defined by a score of 5 and below on the GAD7  
216 questionnaire
- 217 • Scoring 19 and above on the GAD7 questionnaire
- 218 • Have self-reported suicidal thoughts based on their scores on the Patient Health  
219 Questionnaire-9 (PHQ9).
- 220 • Have recently (within the last 6 weeks) started taking psychotropic medication.
- 221 • Not consenting that their contact details (name, surname, email address) will be shared with  
222 the Student Wellbeing team (see the ethical and safety considerations)
- 223 • Receiving psychological treatment is not part of the exclusion criteria.

224

225

226 **Sample size**

227 The sample size of the study is 90 participants (N=45 in treatment, N=45 in Wait-list control) in total.  
228 As this is a pilot RCT study and the objective is mostly to test the feasibility of the trial procedure, and  
229 intervention uptake, and evaluate the acceptability of the intervention towards building capacity for a  
230 larger test population, no formal sample size calculation was performed (46,47). The audit of the  
231 sample sizes for the pilot and feasibility RCTs indicated that the median sample size per arm across all  
232 the types of studies was 30 (48). Browne also recommended that 30 participants per condition are  
233 needed to estimate a parameter (49). Taking a possible dropout rate into account, the aim is to include  
234 50% more participants than initially intended in both arms.

235

236 **Procedure**

237 Recruitment will take place at the Ulster University campuses from April 2023 until April 2024.

238 Information about the study will be provided on the Cerina website (<https://www.cerina.co/>) and on  
239 the Ulster University Student Wellbeing team`s website where potential participants can register by  
240 filling out the online registration form. Those who do will receive an e-mail with an information sheet,  
241 consent form, and a link to the baseline questionnaire. Those who are eligible (based on the baseline  
242 questionnaire) and who give consent will receive another e-mail explaining which group they have  
243 been allocated to. Those who are in the treatment group will receive further instructions on how to  
244 download the Cerina app and technical assistance will be provided if needed. Those who are allocated  
245 to the wait-list control group will receive an email informing them about their group allocation and  
246 their access to the services offered by the Student Wellbeing team voluntarily while they are waiting to  
247 access Cerina.

248 Participants will be recruited from the Ulster University student population through several channels  
249 as described below.

250 The research team will liaise with the Student Wellbeing team to promote the study within their  
251 networks of students through word of mouth and employing banners and/or social media posts on  
252 Cerina`s LinkedIn and Instagram accounts, the Ulster University Student Wellbeing Facebook page,  
253 and the Ulster University Instagram account. All these communications (i.e., emails, banners, and  
254 social media posts) are prepared by the research team and reviewed by the Student Wellbeing team  
255 and the Ulster University Research Ethics Committee in terms of understandability and  
256 appropriateness of the content and the language. They will be circulated within the student email lists  
257 and/or posted on relevant social media pages.

258 The research team will collaborate with the Student Wellbeing team and student networks to organise  
259 online and/or face-to-face workshops to introduce the study and answer interested students' questions.

260 Finally, the Ulster University Students' Union will be approached in person and/or using e-mails to  
261 circulate information about the study within their networks.

262

### 263 **Data Collection Procedures**

264 The consent forms can be signed either digitally through DocuSign or on paper. If the paper version is  
265 signed, the participants will need to email the picture and/or the scanned copy of the consent form to  
266 the research team.

267 After providing informed consent, participants are informed about their group status via email. All  
268 self-report assessments will be administered via email at baseline, 3-weeks, and 6-weeks follow-ups  
269 except for the System Usability Scale (SUS). SUS will only be assessed at 3 weeks and 6 weeks for  
270 intervention group participants. Wait-list group participants will complete SUS at 3 weeks and 6  
271 weeks after their access to Cerina. Qualtrics software is used to generate all self-report assessments  
272 including Generalised Anxiety Disorder-7 (GAD7), Patient Health Questionnaire-9 (PHQ9), Penn  
273 State Worry Questionnaire (PSWQ), Work Social Adjustment Scale (WSAS) and SUS. It will take  
274 approximately 10-15 minutes to complete the self-report assessments.

275 Intervention group participants will be invited to the semi-structured interviews once they complete  
276 their 6-week follow-up assessments. Wait-list group participants will be invited to these interviews  
277 after accessing Cerina, and once they complete their 6-week follow-up assessments. The data  
278 collection for the semi-structured interviews will last approximately 40 minutes, will be remote (online  
279 via the Microsoft Teams account of Ulster University), and will be facilitated by the members of the  
280 research team. The interviews will be digitally (audio and video) recorded and transcribed verbatim  
281 based on participants' consent. Participants will be able to opt out of the video recording or they could  
282 choose to complete an online post-assessment feedback questionnaire (or neither) if they wish to give  
283 more in-depth feedback on the usability aspects and the clinical content of Cerina. The online post-  
284 assessment feedback questionnaire is generated through Qualtrics software (same as other self-report  
285 questionnaires used in the study) and includes the same questions as the topic guide. The response  
286 format is open-ended to give participants more space to express themselves.

287

### 288 **Patient Public Involvement Statement**

289 We have used the NIHR INCLUDE framework (50) to ensure the project considers equality, diversity,  
290 and inclusivity in delivering its objectives. During the product development phase, we ran a series of  
291 workshops and interviews with key stakeholders (aged 18-34, N=4) including a product expert,  
292 researcher (i.e. with expertise in digital interventions), policy expert (i.e. with expertise in policies  
293 regarding data protection, safety and implementation) and a university student between October 2022  
294 and April 2023. The group highlighted the key priorities to facilitate engagement with the intended  
295 users such as customised notifications, chatbots and flexibility to revisit the completed sessions and  
296 exercises whenever they want. Their feedback and the usability and/or data protection-related  
297 concerns were discussed with Cerina's technical team and the clinical safety officer. As a result,  
298 decisions were made regarding the User Interface and the engagement features. This co-design process  
299 involved identifying intended users' needs and preferences based on the literature and the previous  
300 users' feedback on Cerina, defining intervention features to address the user needs and preferences,  
301 designing content and visual features and testing prototypes in accordance with the recommended  
302 guidelines (51). Design and intervention features were incorporated into the final intervention as  
303 described below. Outcomes from the codesign workshops and interviews were disseminated to the



304 group via email. The potential burden of the intervention and possible bugs, glitches and/or typos were  
305 also assessed by the group and amendments were made accordingly. The group will not be involved in  
306 the recruitment and/or conduct of the study.

307 The study will be conducted in partnership with Ulster University. Additionally, the research team has  
308 a good working relationship with the Ulster University Student Wellbeing Team. During the design  
309 stage of the study, the Ulster University Student Wellbeing team was engaged extensively. They  
310 reviewed the recruitment materials and they have been involved in the key decisions regarding the  
311 signposting and risk assessment procedures. The research team will work closely with the Ulster  
312 University Student Wellbeing team during the recruitment process to ensure that students will go  
313 through further assessment with advisors and they will be signposted to the available services  
314 whenever needed. Additionally, the partnership with Ulster University will also ensure the reach and  
315 access to Ulster University students from across different campuses.

316 Finally, all the involved parties (Ulster University, Ulster University Student Wellbeing team,  
317 IT4Anxiety assessment and validation team) will be involved in reviewing the recruitment and  
318 signposting processes and dissemination of the findings.

319

## 320 **Intervention**

321 The intervention is unguided, therefore it does not provide any professional support related to the  
322 therapeutic content of the sessions (52). If participants experience any difficulty with a particular  
323 therapeutic technique on the app and/or a technical problem, they are advised to contact the Cerina  
324 team at [support@cerina.co](mailto:support@cerina.co). If the users experience a distressing situation unrelated to Cerina, they are  
325 advised to contact their General Practitioner and/or a health care professional. Also, there is a self-care  
326 page available on the app including links to external resources for further help such as National Health  
327 Services (NHS) helpline, mental health charities, support groups and Samaritans.

328 Cerina consists of 7 sessions of CBT for the treatment of GAD. Each session contains a range of  
329 information and tasks/exercises to help the user understand the condition of GAD, the treatment  
330 approach, and how it will apply to them. The intervention is based on an evidence-based treatment  
331 protocol; hence the sessions will flow from one to the other and the user will complete the sessions in  
332 a progressive direction. Participants are advised to complete the first six sessions on a weekly basis.  
333 However, they can repeat a session before going on to the next session. The last session is designed as  
334 a review of progress session rather than a full therapy session including exercises and homework  
335 assignments. Once all sessions have been completed, participants can go back over any of the sessions.  
336 There are anxiety management exercises, which the user can go to whenever they wish. There are also  
337 a therapy reflection journal and self-care resources including further anxiety management techniques,  
338 resources, and podcasts that the user will have access to whenever they want.

339 A summary of the content of each session is as follows:

340 **1. Learning About GAD:** The first session provides the user with psycho-education as an  
341 introduction to GAD as a mental health condition and will ask them to consider whether they  
342 recognise the features in themselves.

343 **2. Dealing with worry** – using the worry tree: The aim of this session is to provide the user with  
344 psycho-education on the types of worries. The user starts conceptualising their worries and making  
345 decisions about how to manage different types of worries through the technique called “worry tree”.

346 **3. Managing worry and anxiety:** In this session, the user learns about the link between worry and  
347 anxiety and they gain a deeper understanding of the vicious cycle (i.e. particular situations trigger  
348 worry thoughts and they lead to physiological and psychological reactions and noticing those anxious

349 symptoms lead to more worrying). The worry management techniques such as worry postponement,  
350 and attention focus training, are also introduced to help the user break this vicious cycle.

351 **4. Beliefs about worry:** This session introduces core beliefs about worrying which perpetuate the  
352 worry thoughts. The user learns about the advantages and disadvantages of their beliefs and how  
353 helpful they are in their life.

354 **5. Managing uncertainty:** This session helps the user manage uncertainty through problem-solving  
355 and imaginal exposure techniques. The user learns to deal with their worries and develops an action  
356 plan in a step-by-step manner through problem-solving techniques. The latter helps them to spend less  
357 time and energy on their worries gradually through imaginal exposure.

358 **6. Testing beliefs:** This session aims to guide the user to test their beliefs through behavioural  
359 experiments. They also learn to do a cost-benefit analysis of worrying to help them order their  
360 thinking and be more objective.

361 **7. Review and therapy blueprint:** This session helps the user to review their goals and what they  
362 have learned during the therapy, and to think about how they will take this learning forward to  
363 maintain their progress in continuing to manage their GAD symptoms in the future.

364 Design features identified in the patient and public involvement phase were included in the  
365 intervention to promote user engagement. These include (1) vibrant and simple illustrations to present  
366 the case studies in each sessions; (2) customised notification settings; (3) a separate self-care page  
367 including pod casts and available resources for further help if needed; (4) regular check-ins to rate  
368 mood; (5) embedding a safety mechanism within the user`s conversations with the chatbot. For  
369 instance, if a user talks about death and suicidal thoughts, the chatbot provides contact details of the  
370 available crisis lines and services for further help; and (6) providing more flexibility regarding the  
371 navigation. For instance, the users are able to start where they are left off once they login to the app,  
372 and they can go back and review their therapy journey whenever they want.

373

#### 374 **Wait-list Control Condition**

375 Participants in the waiting list control condition will have access to the on-campus wellbeing services  
376 offered by the Student Wellbeing team should they wish to use the services. The Student Wellbeing  
377 team on the Belfast, Coleraine, and Magee campuses provides free and confidential support and  
378 guidance to students with a broad range of issues, concerns, and challenges, helping them to  
379 successfully engage in their studies. Student Wellbeing Assistants provide an initial assessment to  
380 determine a student`s primary need and then Wellbeing Advisers, Student Mental Health Advisers,  
381 and Accessibility Advisers are available to provide a variety of solution-focused interventions based  
382 on that need. The Accessibility Advisers also help students with disabilities including diagnosed  
383 mental health conditions to get additional support and access funded disability support through  
384 Disabled Students` Allowance. Each campus team is led by an experienced Student Wellbeing  
385 Manager to support the advisers in the management of risk and lead to an efficient and robust response  
386 if a Clinical Incident occurs. Additionally, therapeutic counselling support is also available free to  
387 students through the external counselling provider via a dedicated 24/7 counselling helpline. The  
388 Student Wellbeing Team works closely with the counselling provider to monitor student engagement  
389 and promote the service as appropriate (For further information, please see  
390 <https://www.ulster.ac.uk/wellbeing/health-and-wellbeing>).

391

392

393 **Materials**

394 **Primary outcome measure**

- 395 1. Feasibility is defined as adherence to the intervention, its usability and potential to deliver a  
396 full trial in the future (53,54).

397  
398 Adherence is defined based Staudt`s model of adherence (ref) and it includes behavioural and  
399 attitudinal adherence (55,56). Behavioural adherence refers to the participant`s performance  
400 on the tasks that are necessary to implement an intervention in daily life such as, homework  
401 completion (55,56). Attitudinal adherence refers to the emotional investment and commitment  
402 to the intervention (55,56). To measure behavioural adherence to Cerina, we will collect data  
403 on the number (%) of the login attempts of the participants per week and per month, the  
404 number (%) of intervention group participants with at least 1 session attended, and the number  
405 (%) of intervention group participants with desired number of sessions (N=6) completed.  
406 Furthermore, to measure attitudinal adherence, we will collect data on the number (%) of the  
407 therapeutic content completed by the participants. We will collect data on whether participants  
408 complete the core therapeutic content (i.e. have entries in their worry diary in session 1 and  
409 reflect on their worry diary in session 2), some therapeutic content (i.e. psychoeducational  
410 part) or no therapeutic content at all (i.e. few taps, invalid entries).

411 The usability of Cerina will be measured with the System Usability Scale (SUS) (57) and with  
412 semi-structured interviews. An example item: "I think I would use Cerina frequently". The  
413 SUS is composed of 10 statements that are scored on a 5-point scale of the extent of  
414 agreement (score 0 to 100). The reliability is good (Cronbach's alpha 0.91) (57). Interventions  
415 with scores of 70 and above are accepted as highly usable (57) and scores between 50 and 70  
416 indicate acceptable usability of an intervention. Interventions with scores of 50 and below are  
417 subject to concerns about their usability by the target population and should be investigated  
418 further (57).

419  
420 In order to investigate the potential to deliver a full scale RCT in the future, we will assess the  
421 response rates to the self-report questionnaires, examine the recruitment procedures and  
422 participants` willingness to be randomized to a waiting list control group (53).

423

424

425 **Secondary outcome measures**

- 426 2. The Generalised Anxiety Disorder Scale-7 (GAD-7) (58) is a 7-item self-report scale that  
427 identifies and measures the severity of GAD. An example item for GAD7: "Worrying too  
428 much about different things". Scores range from 0 to 21, with a cut-off score of 5  
429 distinguishing between clinical and non-clinical populations. The scale has good psychometric  
430 properties (58).
- 431 3. The Penn State Worry Questionnaire (PSWQ-PW) is a 15-item inventory assessing both the  
432 weekly status of pathological worry and treatment-related changes of worry during the  
433 treatment (59). An example item: "If I didn`t have enough time to do everything, I didn`t  
434 worry about it". Each item is scored on a 7-point rating scale, ranging from never 0 (never) to  
435 6 (almost always). The total score ranges from 0 to 90 with a high score indicating more  
436 worrying. PSWQ-PW shows good reliability and convergent validity (59).
- 437 4. The Patient Health Questionnaire (PHQ-9) (42) is a 9-item self-report scale that measures  
438 depression symptoms. An example item: "Little interest or pleasure in doing things". Scores

439 range from 0 to 27, with a score of 10 and above considered to be a clinically significant level  
440 of depression. The PHQ-9 has good reliability and validity (60).

441 5. The Work and Social Adjustment Scale (WSAS) (61) is a 5 item self-report measure that  
442 assesses functional impairment. An example item: “Because of my mental health, my ability  
443 to work is impaired”. Scores range from 0 to 40. The scale assesses the impact on work, home,  
444 social and private activities, and personal and family relationships. A score of 20 and above is  
445 considered to indicate severe functional impairment, scores between 10 and 20 suggest severe  
446 but functional impairment and scores of 10 and less are considered subclinical. The scale has  
447 good reliability and validity (61).

448

#### 449 **Process evaluation**

450 Semi-structured interviews will be conducted with the participants who complete the intervention and  
451 consented to be interviewed. The topic guide for the interview was developed by the research team  
452 based on the Consolidated Framework for Implementation Research (CFIR) (62). The core topics  
453 included participants` overall experience and perceptions on the usability of the UI of Cerina, existing  
454 pathways and barriers to using the app in daily life, the clinical utility of the application, the contexts  
455 in which the implementation of the clinical content takes place and the processes of intervention  
456 delivery. We will recruit until data saturation (63), with an estimated sample size of 20 participants.  
457 Descriptions of the context of each interview will be documented in fieldnotes to support analysis.

458 Draft interview schedules have been developed and amended by the research team based on the CFIR  
459 framework and feedback from the participants from the previous studies. Additionally, they have been  
460 reviewed by the Ulster Student Wellbeing team. The topic guide focuses on:

- 461 • The usability of the intervention (i.e. potential barriers and facilitators whilst using the Cerina app  
462 in daily life)
- 463 • Whether the participants relate to the User Interface and/or content of the intervention
- 464 • How the clinical content of the intervention help participants understand and manage their anxiety  
465 symptoms and which specific exercises help and/or do not help them while they are using the  
466 intervention.

467

#### 468 **Data analysis plan**

469 The recruitment and consent rates will be carefully monitored according to the CONSORT guidelines.  
470 The group allocation procedure will be monitored by the technical lead of Cerina (independent  
471 researcher). The response rates to the study questionnaires and the adherence rates will be monitored  
472 by the corresponding author.

473 The process evaluation will be investigated through semi-structured interviews. These interviews will  
474 be audio-recorded and transcribed. The transcripts will be analysed thematically and independently by  
475 two researchers (one experienced qualitative researcher and one researcher who is involved in the data  
476 collection) in NVivo software. The deductive coding will be informed by the CFIR framework (62).  
477 Additionally, there will be an inductive coding. Coders will meet each other regularly and the wider  
478 study team to discuss codes and begin by identifying and indexing themes relevant to an interview  
479 (64). Also, they will explore relationships between descriptive themes (63). The identified themes will  
480 be interrogated about each account, as a means of understanding a particular case; compared across  
481 cases by highlighting potential similarities and differences between respondents; and, finally, related  
482 to those characteristics of the respondent that could be reasonably justified as an explanation which  
483 mediated experience (65).

484 The preliminary effects of Cerina in reducing elevated levels of anxiety and worrying among students  
485 will be tested through the linear mixed models in RStudio version 3.6.1 (66). We will compare  
486 reductions in primary/secondary outcomes between and within groups across two time points in the  
487 intention-to-treat sample, we will use linear mixed models in RStudio version 3.6.1 (66). This method  
488 allows the number of observations to vary between participants and handles missing outcome data.  
489 The mixed model uses a longitudinal data structure that includes both fixed and random effects. Time  
490 (categorical), group (treatment *v.* wait-list control), and interactions between group and time will be  
491 included as fixed effects in mixed models together with a random intercept and random time effect.  
492 Differences in least-squares mean (intervention effects) at each time point with 95% confidence  
493 intervals will be derived. Cohen's *d* for the effect of the intervention will be estimated by calculating  
494 the difference between estimated means (corrected for baseline) divided by raw pooled standard  
495 deviation. Effect sizes of 0.8 are accepted as large, effect sizes of 0.5 are moderate and effect sizes of  
496 0.2 are small (67). A two-sided  $p < 0.05$  indicates statistical significance. These analyses will be done  
497 based on the intention-to-treat sample and missing data will be handled through multiple imputations.

498 The reliable change index will also be used to evaluate whether participants have reliable and  
499 clinically significant change scores from baseline to post-assessment (68).

500

## 501 **Ethics and Dissemination**

502 Ethical approval for the study has been granted by the Ulster University Research Ethics Committee  
503 (ID: FCPSY-22-084). Cerina includes information on crisis lines in the content of the application.  
504 Participants can go to a page where further information on self-care resources and help-seeking are  
505 provided within the application. Additionally, receiving psychological treatment is not exclusion  
506 criteria and all participants are signposted to the services offered by the Student Wellbeing team, their  
507 GP, and/or additional resources (e.g. crisis lines, Lifeline etc) and are encouraged to use these services  
508 regularly through online communication throughout their participation. Eligible participants also need  
509 to agree on sharing their student ID numbers with the Student Wellbeing team. This is necessary for  
510 two main reasons: 1) to signpost participants to the Student Wellbeing when needed and, 2) to be able  
511 to monitor the use of additional psychological services among all participants throughout the study.

512 Interested participants who are currently on psychotropic medication or presenting minimal and/or  
513 severe anxiety symptoms (as measured by the GAD7) and/or reporting suicidal thoughts during the  
514 baseline assessment will receive an e-mail about their results and will be informed that Cerina is not  
515 designed to meet their needs and they will be signposted to the Student Wellbeing team for further  
516 help. In that email, the crisis lines and resources for further help will be provided.

517 Another potential risk is that some participants might get worse whilst they are using Cerina. The  
518 existing studies testing CBT-based mobile applications in treating GAD symptoms indicate that this is  
519 a rare risk (19,47). We will monitor this risk based on participants' responses to the online  
520 questionnaires. We will also monitor their answers to the regular check-in questions asking about their  
521 mood whenever they log in to the app. If participants' scores are getting worse and/or their check-in  
522 questions indicate that they might be feeling low lately, they will receive a notification on the app  
523 directing them to the self-care page, anxiety management exercises, and/or the resources pages for  
524 further help. They will also receive an option as a notification, to be referred to the Student Wellbeing  
525 team for further risk assessment. If they choose this option, the research team will notify the Student  
526 Wellbeing team to schedule a meeting with them for risk assessment and further help.

527 The results of the study will be disseminated through publications in scientific journals, presentations  
528 at relevant congresses, conferences and/or public events.

529

## 530 **Findings to Date**

531 As of 31 March 2024, we have recruited 158 (N=79 intervention; N=79 wait-list control group)  
532 participants. In the intervention group, a total of 29 participants completed their 3-week assessments,  
533 and a total of 47 participants completed their 6-week post-assessments. In the wait-list control group, a  
534 total of 43 participants completed their 3-week assessments, and a total of 56 participants completed  
535 their 6-week assessments. Additionally, we have conducted 4 interviews with the participants and a  
536 total of 16 participants opted out of the interviews but completed post-assessment feedback  
537 questionnaires.

538

## 539 **Discussion**

540 The current paper describes a study protocol of a pilot feasibility RCT with two main objectives: to  
541 learn about the feasibility (i.e. adherence to the intervention, its usability and potential to deliver a full  
542 trial in the future) of delivering Cerina among a student population; and 2) to test the preliminary  
543 effects of Cerina in reducing GAD symptoms compared to a wait-list control group among Ulster  
544 University students presenting with self-reported GAD symptoms.

545 One of the strengths of this study is that it proposes to test a low-threshold CBT-based mobile  
546 application among Ulster University student population who have low receipt of on-campus and  
547 external psychological support services despite their vulnerability for mental health problems (23).  
548 Digital CBT based interventions aims to provide easy access, anonymity, reduced costs and stigma  
549 attached to help-seeking (30). However, there are mixed results for the effectiveness of these  
550 interventions among student populations (31-37). Additionally, recent studies point to low engagement  
551 with CBT-based mobile applications in particular among student populations despite the assumed  
552 benefits (42). Ciharova and colleagues (69) investigated the reasons for drop-out from the ICare  
553 Prevent intervention among university students in the Netherlands (69). There were several person-  
554 and intervention-related reasons for dropout most commonly, lengthy sessions colliding with students`  
555 busy academic schedules, needs for different kinds of help and/or absence of personal contact (69).  
556 Although Cerina is an unguided intervention, we expect that the design features such as customised  
557 notification settings, flexibility in navigation and the chatbot function will address some of the key  
558 person- and intervention-related drop-out reasons identified by Ciharova and colleagues (69).  
559 Therefore, this study will provide an opportunity to contribute to the growing evidence base on the  
560 role of emerging technology-based engagement features, and their impact on the effectiveness of  
561 digital CBT-based interventions.

562 Another strength of this study is that it is based on a partnership and a collaboration between Ulster  
563 University, Ulster University Student Wellbeing team and Cerina, a mental health start-up. All these  
564 parties have been involved in making key decisions about the recruitment strategies, risk assessment  
565 and signposting procedures as well as dissemination plans. A recent study by Lattie and colleagues  
566 (42) highlighted the digital overload among university students during and post-pandemic and the  
567 ineffectiveness of email and social media communication strategies during the recruitment process.  
568 Additionally, they note the disruption caused by the pandemic had a negative impact on the  
569 communications between the research team and the student wellbeing staff as the staff members were  
570 overburdened by competing priorities (42). In the current study, we expect that the established  
571 partnership and the utilisation of various recruitment channels will help reach and access to the  
572 intended population, and such challenges specific to the pandemic context will not pose problems.

573 The limitations of the current study must also be acknowledged. First of all, the study is designed as a  
574 feasibility trial and it is not powered to detect statistically significant effects of the intervention  
575 (46,47). Second, although the study participants will be recruited from across the four campuses of  
576 Ulster University, the results might not generalise beyond the inclusion and exclusion criteria of the

577 current study. Third, the wait-list control group has been chosen as a comparison group in the current  
578 study to offer the possibility of completing the intervention to a vulnerable population who might not  
579 have access to any form of psychological help otherwise. It is known that wait-list control groups  
580 motivate people to participate in the control group and the trial, and lead to high expectations of the  
581 effects of the intervention (70). It is also known that high expectations result in better outcomes of  
582 interventions. Therefore, the wait-list control group may considerably overestimate the effects of an  
583 intervention in the current study (70).

584 To conclude, this study has several strengths which will contribute to the literature about digital CBT-  
585 based interventions for treating generalised anxiety symptoms among university students. These are  
586 established partnerships with the relevant stakeholders strengthening the reach and access to the  
587 intended population, engagement features which are incorporated into the Cerina intervention based  
588 on the co-design principles, and low-intensity CBT-based mobile application targeting Ulster  
589 University students.

590 **References**

- 591 1. World Health Organisation. Anxiety Disorders. [Internet]. Available from:  
592 <https://www.who.int/news-room/fact-sheets/detail/anxiety-disorders> [Accessed 3rd  
593 July 2023]
- 594 2. Ruscio AM, Hallion LS, Lim CCW, Aguilar-Gaxiola S, Al-Hamzawi A, Alonso J,  
595 et al. Cross-sectional comparison of the epidemiology of DSM-5 generalized  
596 anxiety disorder across the globe. *JAMA Psychiatry*. 2017;74(5):465–75.
- 597 3. Santomauro DF, Mantilla Herrera AM, Shadid J, Zheng P, Ashbaugh C, Pigott  
598 DM, et al. Global prevalence and burden of depressive and anxiety disorders in  
599 204 countries and territories in 2020 due to the COVID-19 pandemic. *Lancet*.  
600 2021;398(10312):1700–12.
- 601 4. Cao H, Wu Y, Yin H, Sun Y, Yuan H, Tao M. Global Trends in the Incidence of  
602 Anxiety Disorders From 1990 to 2019: Joinpoint and Age-Period-Cohort Analysis  
603 Study. *JMIR public Heal Surveill*. 2024;10:e49609.
- 604 5. Szuhany KL, Simon NM. Anxiety Disorders: A Review. *Jama*.  
605 2022;328(24):2431–45.
- 606 6. Alonso J, Liu Z, Evans-Lacko S, Sadikova E, Sampson N, Chatterji S, et al.  
607 Treatment gap for anxiety disorders is global: Results of the World Mental Health  
608 Surveys in 21 countries. *Depress Anxiety*. 2018;35(3):195–208.
- 609 7. Auerbach R, Mortier P, Bruffaerts R, Alonso J, Benjet C, Cuijpers P, et al. Student  
610 Project : Prevalence and Distribution of Mental Disorders. *J Abnorm Psychol*.  
611 2019;127(7):623–38.
- 612 8. Xiao H, Carney DM, Youn SJ, Janis RA, Castonguay LG, Hayes JA, et al. Are we  
613 in crisis? National mental health and treatment trends in college counseling  
614 centers. *Psychol Serv*. 2017;14(4):407–15.
- 615 9. McLafferty M, Lapsley CR, Ennis E, Armour C, Murphy S, Bunting BP, et al.  
616 Mental health, behavioural problems and treatment seeking among students  
617 commencing university in Northern Ireland. *PLoS One* [Internet]. 2017;12(12):1–  
618 14. Available from: <http://dx.doi.org/10.1371/journal.pone.0188785>
- 619 10. Halperin SJ, Henderson MN, Prenner S, Grauer JN. Prevalence of Anxiety and  
620 Depression Among Medical Students During the Covid-19 Pandemic: A Cross-  
621 Sectional Study. *J Med Educ Curric Dev*. 2021;8:238212052199115.
- 622 11. Huang Y, Zhao N. Generalized anxiety disorder, depressive symptoms and sleep  
623 quality during COVID-19 outbreak in China: a web-based cross-sectional survey.  
624 *Psychiatry Res* [Internet]. 2020;288(March):112954. Available from:  
625 <https://doi.org/10.1016/j.psychres.2020.112954>
- 626 12. Voltmer E, Kösllich-Strumann S, Walther A, Kasem M, Obst K, Kötter T. The  
627 impact of the COVID-19 pandemic on stress, mental health and coping behavior in  
628 German University students – a longitudinal study before and after the onset of the  
629 pandemic. *BMC Public Health*. 2021;21(1):1–15.
- 630 13. Saraswathi I, Saikarthik J, Kumar KS, Srinivasan KM, Ardhanaari M, Gunapriya  
631 R. Impact of COVID-19 outbreak on the mental health status of undergraduate  
632 medical students in a COVID-19 treating medical college: A prospective  
633 longitudinal study. *PeerJ*. 2020;8.



- 634 14. Reuter PR, Forster BL, Kruger BJ. A longitudinal study of the impact of COVID-  
635 19 restrictions on students' health behavior, mental health and emotional well-  
636 being. *PeerJ*. 2021;9.
- 637 15. Jones NL, Gilman SE, Cheng TL, Drury SS, Hill C V., Geronimus AT. Life  
638 Course Approaches to the Causes of Health Disparities. *Am J Public Health*.  
639 2019;109:S48–55.
- 640 16. Schulenberg JE, Sameroff AJ, Cicchetti D. The transition to adulthood as a critical  
641 juncture in the course of psychopathology and mental health. *Dev Psychopathol*.  
642 2004;16(4):799–806.
- 643 17. Arnett JJ. College Students as Emerging Adults: The Developmental Implications  
644 of the College Context. *Emerg Adulthood*. 2016;4(3):219–22.
- 645 18. Pei J, Amanvermez Y, Vigo D, Puyat J, Kessler RC, Mortier P, et al.  
646 Sociodemographic Correlates of Mental Health Treatment Seeking Among  
647 College Students: A Systematic Review and Meta-Analysis. *Psychiatr Serv*.  
648 2024;1–14.
- 649 19. Acharya L, Jin L, Collins W. College life is stressful today—Emerging stressors  
650 and depressive symptoms in college students. *J Am Coll Heal*. 2018;66(7):655–64.
- 651 20. De Girolamo G, Dagani J, Purcell R, Cocchi A, McGorry PD. Age of onset of  
652 mental disorders and use of mental health services: Needs, opportunities and  
653 obstacles. *Epidemiol Psychiatr Sci*. 2012;21(1):47–57.
- 654 21. Lagdon S, Ross J, Robinson M, Contractor AA, Charak R, Armour C. Assessing  
655 the Mediating Role of Social Support in Childhood Maltreatment and  
656 Psychopathology Among College Students in Northern Ireland. *J Interpers  
657 Violence*. 2021;36(3–4):NP2112–2136NP.
- 658 22. Travers Á, Armour C, Hansen M, Cunningham T, Lagdon S, Hyland P, et al.  
659 Lesbian, gay or bisexual identity as a risk factor for trauma and mental health  
660 problems in Northern Irish students and the protective role of social support. *Eur J  
661 Psychotraumatol* [Internet]. 2020;11(1). Available from:  
662 <https://doi.org/10.1080/20008198.2019.1708144>.
- 663 23. Ennis E, McLafferty M, Murray E, Lapsley C, Bjourson T, Armour C, et al.  
664 Readiness to change and barriers to treatment seeking in college students with a  
665 mental disorder. *J Affect Disord*. 2019;252(August 2018):428–34.
- 666 24. Ebert DD, Mortier P, Kaehlke F, Bruffaerts R, Baumeister H, Auerbach RP, et al.  
667 Barriers of mental health treatment utilization among first-year college students:  
668 First cross-national results from the WHO World Mental Health International  
669 College Student Initiative. *Int J Methods Psychiatr Res*. 2019;28(2):1–14.
- 670 25. Dunbar MS, Sontag-Padilla L, Ramchand R, Seelam R, Stein BD. Mental Health  
671 Service Utilization Among Lesbian, Gay, Bisexual, and Questioning or Queer  
672 College Students. *J Adolesc Heal* [Internet]. 2017;61(3):294–301. Available from:  
673 <http://dx.doi.org/10.1016/j.jadohealth.2017.03.008>
- 674 26. NICE. Generalised anxiety disorder and panic disorder in adults (CG133).  
675 2020;(April 2007):1–928. Available from: [www.nice.org.uk/guidance/cg113](http://www.nice.org.uk/guidance/cg113)
- 676 27. Cuijpers P, Miguel C, Harrer M, Plessen CY, Ciharova M, Ebert D, et al.  
677 Cognitive behavior therapy vs. control conditions, other psychotherapies,  
678 pharmacotherapies and combined treatment for depression: a comprehensive meta-  
679 analysis including 409 trials with 52,702 patients. *World Psychiatry*.  
680 2023;22(1):105–15.

- 681 28. Cuijpers P, Eylem O, Karyotaki E, Zhou X, Sijbrandij M. Psychotherapy for  
682 depression and anxiety in low- and middle-income countries [Internet]. Global  
683 Mental Health and Psychotherapy: Adapting Psychotherapy for Low- and Middle-  
684 Income Countries. Elsevier Inc.; 2019. 173–192 p. Available from:  
685 <http://dx.doi.org/10.1016/B978-0-12-814932-4.00008-2>
- 686 29. Kelsey C. Martin Mhatre V. Ho J-AL, Kevin Range and DMYAM. NIH Public  
687 Access. Bone [Internet]. 2012;23(1):1–7. Available from:  
688 <https://www.ncbi.nlm.nih.gov/pmc/articles/PMC3624763/pdf/nihms412728.pdf>
- 689 30. Linardon J, Fuller-Tyszkiewicz M. Attrition and adherence in smartphone-  
690 delivered interventions for mental health problems: A systematic and meta-  
691 analytic review. *J Consult Clin Psychol*. 2020;88(1):1–13.
- 692 31. Karyotaki E, Klein AM, Ciharova M, Bolinski F, Krijnen L, de Koning L, et al.  
693 Guided internet-based transdiagnostic individually tailored Cognitive Behavioral  
694 Therapy for symptoms of depression and/or anxiety in college students: A  
695 randomized controlled trial. *Behav Res Ther*. 2022;150(January).
- 696 32. Weisel KK, Zarski AC, Berger T, Krieger T, Schaub MP, Moser CT, et al.  
697 Efficacy and cost-effectiveness of guided and unguided internet- and mobile-based  
698 indicated transdiagnostic prevention of depression and anxiety (ICare Prevent): A  
699 three-armed randomized controlled trial in four European countries. *Internet Interv*  
700 [Internet]. 2019;16(April 2018):52–64. Available from:  
701 <https://doi.org/10.1016/j.invent.2018.04.002>
- 702 33. Weisel KK, Zarski AC, Berger T, Krieger T, Moser CT, Schaub MP, et al. User  
703 experience and effects of an individually tailored transdiagnostic internet-based  
704 and mobile-supported intervention for anxiety disorders: Mixed-methods study. *J*  
705 *Med Internet Res*. 2020;22(9).
- 706 34. Gericke F, Ebert DD, Breet E, Auerbach RP, Bantjes J. A qualitative study of  
707 university students' experience of Internet-based CBT for depression. *Couns*  
708 *Psychother Res*. 2021;21(4):792–804.
- 709 35. Rahmadiana M, Karyotaki E, Schulte M, Ebert DD, Passchier J, Cuijpers P, et al.  
710 Transdiagnostic internet intervention for Indonesian university students with  
711 depression and anxiety: Evaluation of feasibility and acceptability. *JMIR Ment*  
712 *Heal*. 2021;8(3).
- 713 36. Lee RA, Jung ME. Evaluation of an mhealth app (DeStressify) on university  
714 students-mental health: Pilot trial. *JMIR Ment Heal*. 2018;5(1).
- 715 37. Becker TD, Torous JB. Recent Developments in Digital Mental Health  
716 Interventions for College and University Students. *Curr Treat Options Psychiatry*.  
717 2019;6(3):210–20.
- 718 38. Carl JR, Miller CB, Henry AL, Davis ML, Stott R, Smits JAJ, et al. Efficacy of  
719 digital cognitive behavioral therapy for moderate-to-severe symptoms of  
720 generalized anxiety disorder: A randomized controlled trial. *Depress Anxiety*.  
721 2020;37(12):1168–78.
- 722 39. Miller CB, Gu J, Henry AL, Davis ML, Espie CA, Stott R, et al. Feasibility and  
723 efficacy of a digital CBT intervention for symptoms of Generalized Anxiety  
724 Disorder: A randomized multiple-baseline study. *J Behav Ther Exp Psychiatry*  
725 [Internet]. 2021;70(September 2020):101609. Available from:  
726 <https://doi.org/10.1016/j.jbtep.2020.101609>

- 727 40. Andersson E, Enander J, Andrén P, Hedman E, Ljótsson B, Hursti T, et al.  
728 Internet-based cognitive behaviour therapy for obsessive-compulsive disorder: A  
729 randomized controlled trial. *Psychol Med*. 2012;42(10):2193–203.
- 730 41. Paxling B, Almlöv J, Dahlin M, Carlbring P, Breitholtz E, Eriksson T, et al.  
731 Guided Internet-delivered cognitive behavior therapy for generalized anxiety  
732 disorder: A randomized controlled trial. *Cogn Behav Ther*. 2011;40(3):159–73.
- 733 42. Lattie EG, Cohen KA, Hersch E, Williams KDA, Kruzan KP, MacIver C, et al.  
734 Uptake and effectiveness of a self-guided mobile app platform for college student  
735 mental health. *Internet Interv [Internet]*. 2022;27:100493. Available from:  
736 <https://doi.org/10.1016/j.invent.2021.100493>
- 737 43. Borghouts J, Eikey E, Mark G, De Leon C, Schueller SM, Schneider M, et al.  
738 Barriers to and facilitators of user engagement with digital mental health  
739 interventions: Systematic review. *J Med Internet Res*. 2021;23(3).
- 740 44. Gan DZQ, McGillivray L, Larsen ME, Christensen H, Torok M. Technology-  
741 supported strategies for promoting user engagement with digital mental health  
742 interventions: A systematic review. *Digit Heal*. 2022;8.
- 743 45. Ramos G, Hernandez-ramos R, Taylor M, Stephen M. State of the Science: Using  
744 Digital Mental Health Interventions to Extend the Impact of Psychological  
745 Services. 2024;
- 746 46. Cooper CL, Whitehead A, Pottrill E, Julious SA, Walters SJ. Are pilot trials useful  
747 for predicting randomisation and attrition rates in definitive studies: A review of  
748 publicly funded trials. *Clin Trials*. 2018;15(2):189–96.
- 749 47. Lancaster GA, Thabane L. Guidelines for reporting non-randomised pilot and  
750 feasibility studies. *Pilot Feasibility Stud*. 2019;5(1):1–6.
- 751 48. Billingham SA, Whitehead AL, Julious SA. An audit of sample sizes for pilot and  
752 feasibility trials being undertaken in the United Kingdom registered in the United  
753 Kingdom Clinical Research Network database. *BMC Med Res Methodol*.  
754 2013;13(1):2–7.
- 755 49. Browne RH. On the use of a pilot sample for sample size determination. *Stat Med*.  
756 1995;14(17):1933–40.
- 757 50. National Institute for Health and Care Research. [Internet]. Available from:  
758 [https://www.nihr.ac.uk/documents/improving-inclusion-of-under-served-groups-](https://www.nihr.ac.uk/documents/improving-inclusion-of-under-served-groups-in-clinical-research-guidance-from-include-project/25435)  
759 [in-clinical-research-guidance-from-include-project/25435](https://www.nihr.ac.uk/documents/improving-inclusion-of-under-served-groups-in-clinical-research-guidance-from-include-project/25435) [Accessed 3rd July  
760 2023]
- 761 51. Li SH, Achilles MR, Spanos S, Habak S, Werner-Seidler A, O’dea B. A cognitive  
762 behavioural therapy smartphone app for adolescent depression and anxiety: co-  
763 design of ClearlyMe. *Cogn Behav Ther*. 2022;15(8).
- 764 52. Andersson G, Carlbring P, Titov N, Lindfors N. Internet Interventions for Adults  
765 with Anxiety and Mood Disorders: A Narrative Umbrella Review of Recent Meta-  
766 Analyses. *Can J Psychiatry*. 2019;64(7):465–70.
- 767 53. Eylem O, van Straten A, de Wit L, Rathod S, Bhui K, Kerkhof AJFM. Reducing  
768 suicidal ideation among Turkish migrants in the Netherlands and in the UK: the  
769 feasibility of a randomised controlled trial of a guided online intervention. *Pilot*  
770 *Feasibility Stud*. 2021;7(1):1–18.
- 771 54. Arshad U, Farhat-ul-Ain, Gauntlett J, Husain N, Chaudhry N, Taylor PJ. A  
772 Systematic Review of the Evidence Supporting Mobile- and Internet-Based

- 773 Psychological Interventions For Self-Harm. *Suicide Life-Threatening Behav.*  
774 2020;50(1):151–79.
- 775 55. Staudt M. Treatment engagement with caregivers of at-risk children: Gaps in  
776 research and conceptualization. *J Child Fam Stud.* 2007;16(2):183–96.
- 777 56. Hanano M, Rith-Najarian L, Boyd M, Chavira D. Measuring Adherence within a  
778 Self-Guided Online Intervention for Depression and Anxiety: Secondary Analyses  
779 of a Randomized Controlled Trial. *JMIR Ment Heal.* 2022;9(3):1–23.
- 780 57. Bangor A, Kortum PT, Miller JT. An empirical evaluation of the system usability  
781 scale. *Int J Hum Comput Interact.* 2008;24(6):574–94.
- 782 58. Spitzer RL, Kroenke K, Williams JBW. Validation and utility of a self-report  
783 version of PRIME-MD. *Prim Care Companion J Clin Psychiatry.* 2000;2(1):31.
- 784 59. Stöber J, Bittencourt J. Weekly assessment of worry: An adaptation of the Penn  
785 State Worry Questionnaire for monitoring changes during treatment. *Behav Res*  
786 *Ther.* 1998;36(6):645–56.
- 787 60. Spitzer RL, Kroenke K, Williams JBW. Validation and utility of a self-report  
788 563 version of PRIME-MD. *Prim Care Companion J Clin Psychiatry.*  
789 2000;2(1):31.
- 790 61. Mundt JC, Marks IM, Shear MK, Greist JH. The Work and Social Adjustment  
791 Scale: A simple measure of impairment in functioning. *Br J Psychiatry.*  
792 2002;180(MAY):461–4.
- 793 62. Birken SA, Powell BJ, Pesseau J, Kirk MA, Lorencatto F, Gould NJ, et al.  
794 Combined use of the Consolidated Framework for Implementation Research  
795 (CFIR) and the Theoretical Domains Framework (TDF): A systematic review.  
796 *Implement Sci.* 2017;12(1):1–14.
- 797 63. Hennink M, Kaiser BN. Sample sizes for saturation in qualitative research: A  
798 systematic review of empirical tests. *Soc Sci Med [Internet].* 2022;292:114523.  
799 Available from: <https://doi.org/10.1016/j.socscimed.2021.114523>
- 800 64. Braun V, Clarke V. Using thematic analysis in psychology. *Qual Res Psychol.*  
801 2006;3(2):77–101.
- 802 65. Braun, V., Clarke, V., & Rance, N. How to use thematic analysis with interview  
803 data (process research). In N. P. Moller, & A. Vossler (Eds.), *The Counselling &*  
804 *Psychotherapy Research Handbook Sage*;2014.
- 805 66. R Core Team. R: A Language and Environment for Statistical Computing. R  
806 Foundation for Statistical Computing, Vienna. [Internet]. Available from:  
807 <https://www.R-project.org> [Accessed 3rd July 2023]
- 808 67. Cohen J. *Statistical power analysis for the behavioral sciences.* Routledge; 2013  
809 May 13.
- 810 68. Jacobson NS, Truax P. Clinical Significance: A Statistical Approach to Defining  
811 Meaningful Change in Psychotherapy Research. *J Consult Clin Psychol.*  
812 1991;59(1):12–9.
- 813 69. Ciharova M, Cuijpers P, Amanvermez Y, Riper H, Klein AM, Bolinski F, et al.  
814 Use of tailoring features and reasons for dropout in a guided internet-based  
815 transdiagnostic individually-tailored cognitive behavioral therapy for symptoms of  
816 depression and/or anxiety in college students. *Internet Interv.* 2023;34(March):1–  
817 11.

818 70. Tønning ML, Kessing LV, Bardram JE, Faurholt-Jepsen M. Methodological  
819 challenges in randomized controlled trials on smartphone-based treatment in  
820 psychiatry: Systematic review. J Med Internet Res. 2019;21(10):1–22.

821  
822

823 **Authors' contributions:**

824 OEB had the idea for the study, and OEB and GL designed the study. SP, TR, PM, and JC  
825 contributed to the conception of the work. MI wrote the treatment protocol for the  
826 intervention. KA and TR contributed to the literature search. All authors read and contributed  
827 to the revisions and the final paper.

828

829 **Funding statement:**

830 This work was conducted as part of the NWE INTERREG IT4Anxiety project in partnership  
831 between Cerina Therapeutics and Ulster University. The project is supported by the European  
832 Commission. The sponsor was not involved in writing up the manuscript and/or in the decision to  
833 submit it for the publication.

834

835 **Acknowledgements:**

836 The authors would like to acknowledge Omkar Kadam (Cerina Head of Innovation), Priyadharshini  
837 Rajaram (Cerina Technical Product Manager) and Charlotte Monnickendam (Cerina Head of  
838 Partnerships) for their work and dedication to product development and innovation. They also wish to  
839 thank the Cerina Board of Directors Andrew Vallance Owen, Anoop Aggarwal and the rest of the  
840 advisors for their continuous support for Cerina`s evidence-based approach. Finally, the authors would  
841 like to thank the stakeholder group who is involved in the product development.

842

843 **Competing Interests:**

844 No competing interests.



Figure 1. Participant flow through trial

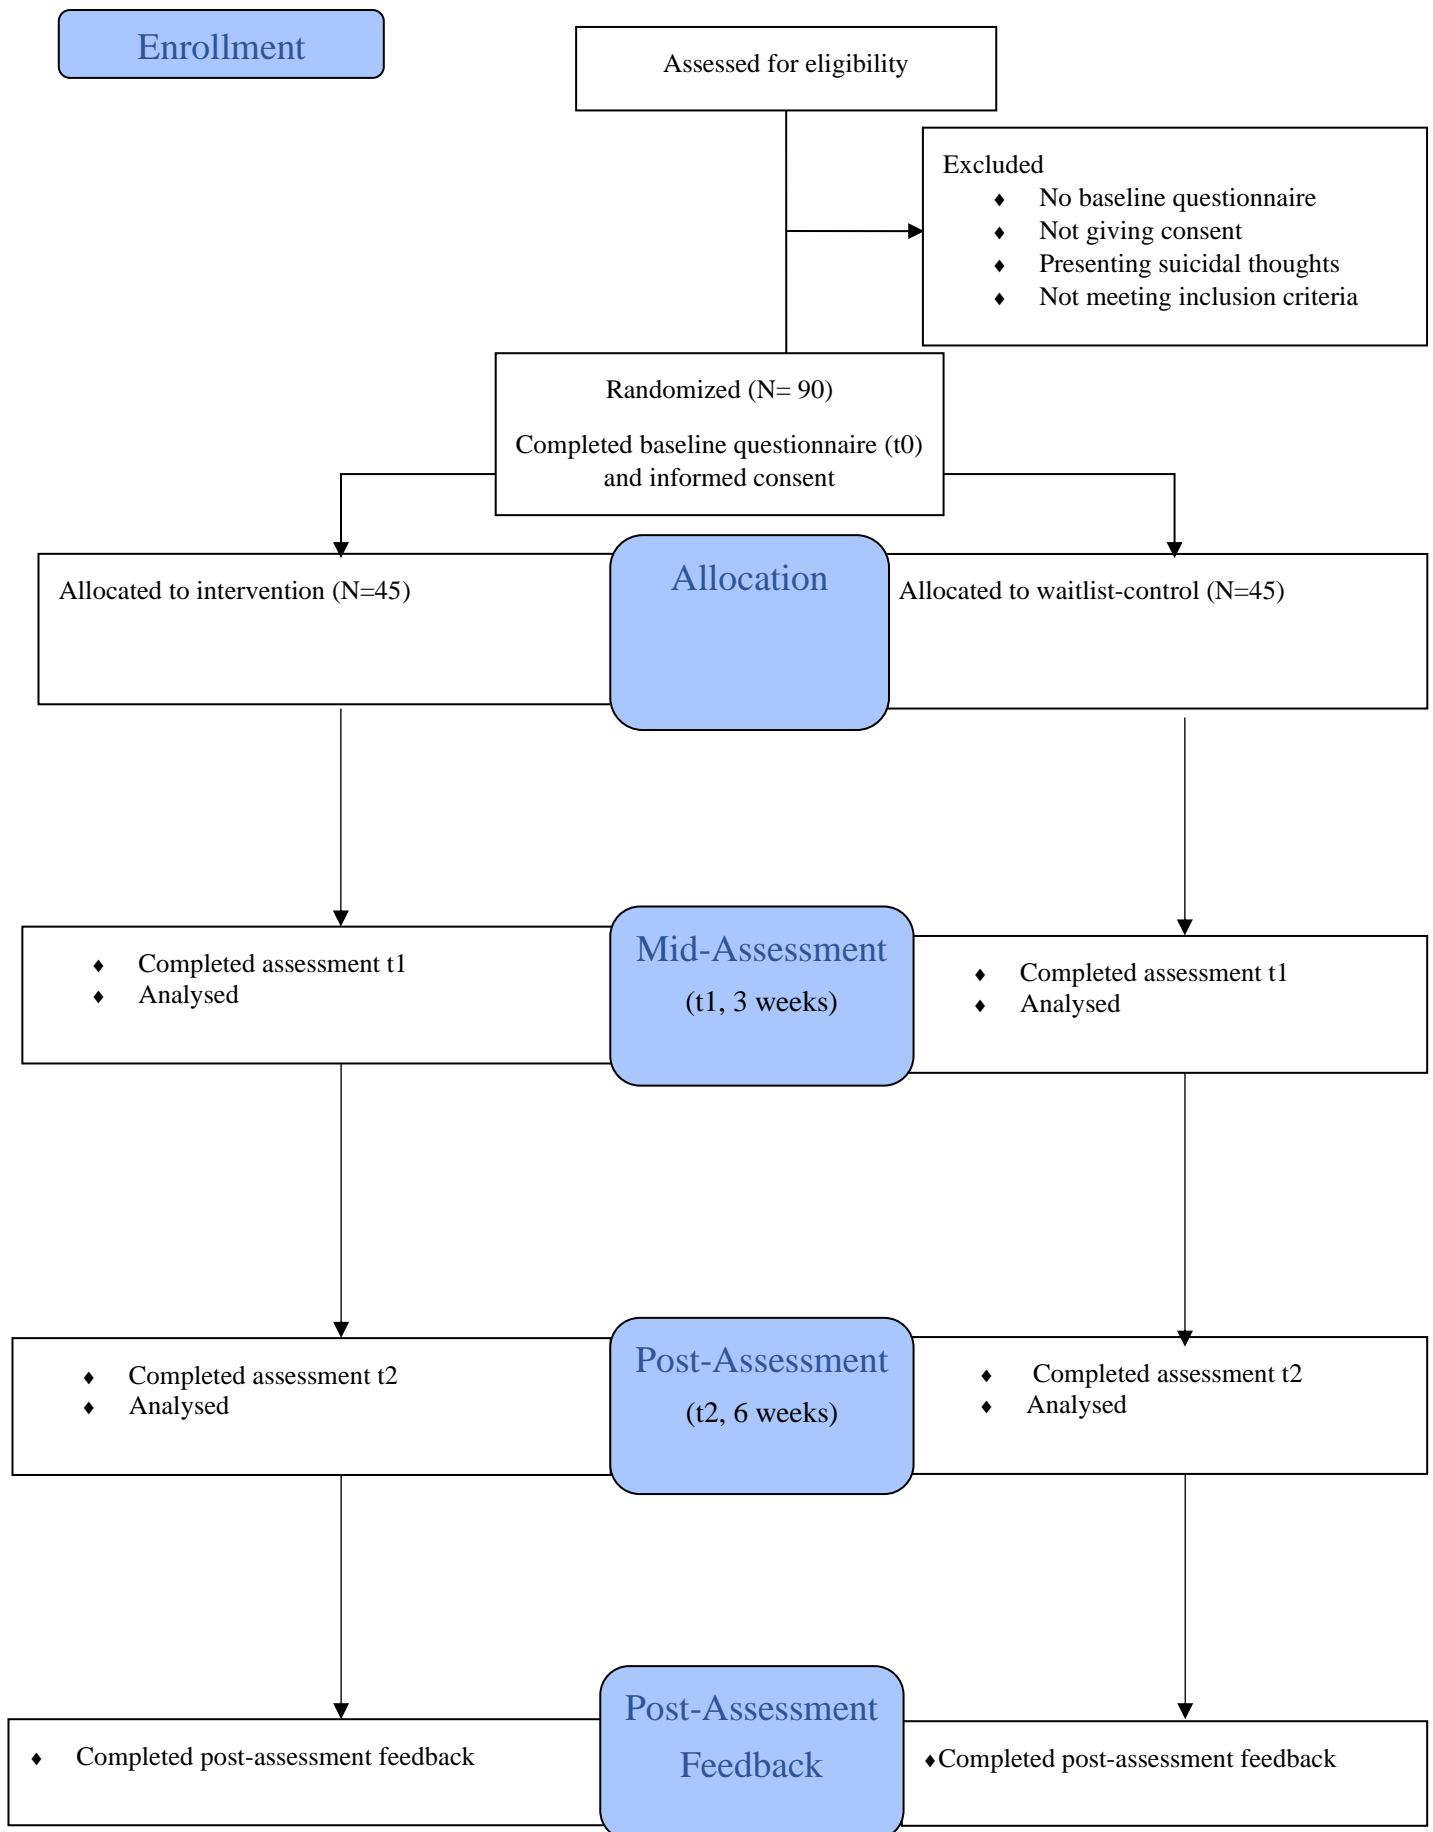

Source: https://www.medrxiv.org/content/10.1101/2024.05.04.24306859v1.full.pdf
